# Supplementary material for: The association of early life socioeconomic conditions with prediabetes and type 2 diabetes: results from the Maastricht study
Source: Springer Nature journal article supplement (doi:10.1186/s12939-017-0553-7), 2017-04-05
Supplement: MOESM1 [file 12202268]

**Supplement table 1. Associations between early life socioeconomic conditions and health behaviour and BMI, n=3263<sup>a</sup>**

|                                                                     |        | Health behaviour       |                            |                                    |                        |
|---------------------------------------------------------------------|--------|------------------------|----------------------------|------------------------------------|------------------------|
|                                                                     |        | BMI (>30)              | Physical Activity<br>(Low) | Smoking Status<br>(Current smoker) | Alcohol use<br>(High)  |
| Early life socioeconomic conditions                                 |        | Odds Ratio<br>(95% CI) | Odds Ratio<br>(95% CI)     | Odds Ratio<br>(95% CI)             | Odds Ratio<br>(95% CI) |
| Model 1, unadjusted                                                 | High   | 1.00                   | 1.00                       | 1.00                               | 1.00                   |
|                                                                     | Medium | 1.33 (1.08-1.65)       | 1.06 (0.88-1.27)           | 0.79 (0.62-1.02)                   | 0.77 (0.64-0.93)       |
|                                                                     | Low    | 1.83 (1.49-2.25)       | 1.10 (0.92-1.33)           | 0.90 (0.71-1.15)                   | 0.67 (0.55-0.81)       |
| Model 2, adjusted for sex and age                                   | High   | 1.00                   | 1.00                       | 1.00                               | 1.00                   |
|                                                                     | Medium | 1.30 (1.05-1.61)       | 1.02 (0.84-1.23)           | 0.84 (0.65-1.07)                   | 0.75 (0.62-0.90)       |
|                                                                     | Low    | 1.76 (1.42-2.17)       | 1.03 (0.85-1.25)           | 0.98 (0.77-1.26)                   | 0.64 (0.52-0.78)       |
| Model 3, adjusted for sex, age and current socioeconomic conditions | High   | 1.00                   | 1.00                       | 1.00                               | 1.00                   |
|                                                                     | Medium | 1.09 (0.87-1.36)       | 1.00 (0.82-1.21)           | 0.73 (0.57-0.95)                   | 0.87 (0.71-1.06)       |
|                                                                     | Low    | 1.27 (1.01-1.58)       | 0.99 (0.81-1.21)           | 0.78 (0.60-1.01)                   | 0.85 (0.69-1.05)       |

<sup>a</sup> Outcome measures were dichotomized by comparing the worst category to the other two categories combined.
