# Supplementary material for: The association of early life socioeconomic conditions with prediabetes and type 2 diabetes: results from the Maastricht study
Source: Springer Nature journal article supplement (doi:10.1186/s12939-017-0553-7), 2017-04-05
Supplement: MOESM2 [file 12202268]

**Supplement table 2.****Associations between BMI, health behaviour and current socioeconomic conditions with diabetes status <sup>a</sup>**

|                                  |            | Prediabetes<br>(total n=2357)<br>Odds ratio<br>(95% CI) | T2DM<br>(total n=2770)<br>Odds ratio<br>(95% CI) |
|----------------------------------|------------|---------------------------------------------------------|--------------------------------------------------|
| Current socioeconomic conditions | High       | 1.00                                                    | 1.00                                             |
|                                  | Medium     | 1.33 (1.04-1.71)                                        | 1.69 (1.35-2.11)                                 |
|                                  | Low        | 1.67 (1.30-2.15)                                        | 3.43 (2.76-4.25)                                 |
| BMI                              | Normal     | 1.00                                                    | 1.00                                             |
|                                  | Overweight | 2.23 (1.75- 2.85)                                       | 2.87 (2.28- 3.62)                                |
|                                  | Obese      | 4.75 (3.51- 6.41)                                       | 13.29 (10.19-17.34)                              |
| Physical activity                | High       | 1.00                                                    | 1.00                                             |
|                                  | Medium     | 0.98 (0.75- 1.28)                                       | 1.16 (0.92-1.47)                                 |
|                                  | Low        | 1.27 (0.97- 1.66)                                       | 1.88 (1.50-2.37)                                 |
| Smoking status                   | Never      | 1.00                                                    | 1.00                                             |
|                                  | Former     | 1.39 (1.11- 1.75)                                       | 1.27 (1.05-1.54)                                 |
|                                  | Current    | 1.39 (0.99- 1.95)                                       | 1.77 (1.35-2.31)                                 |
| Alcohol use                      | None       | 1.00                                                    | 1.00                                             |
|                                  | Low        | 0.65 (0.48- 0.88)                                       | 0.26 (0.20- 0.32)                                |
|                                  | High       | 0.75 (0.55- 1.04)                                       | 0.21 (0.16- 0.27)                                |

<sup>a</sup> All models were adjusted for age and sex.
