# Supplementary material for: The association of early life socioeconomic conditions with prediabetes and type 2 diabetes: results from the Maastricht study
Source: Springer Nature journal article supplement (doi:10.1186/s12939-017-0553-7), 2017-04-05
Supplement: MOESM3 [file 12202268]

**Supplement Table 3. Odds ratios for newly diagnosed diabetes by early life socioeconomic conditions.<sup>a</sup>**

|                                         | Early life socioeconomic conditions | Newly diagnosed diabetes (n=1994)               |                                                                                   |
|-----------------------------------------|-------------------------------------|-------------------------------------------------|-----------------------------------------------------------------------------------|
|                                         |                                     | Adjusted for age and sex<br>Odds ratio (95% CI) | Adjusted for age, sex and current socioeconomic conditions<br>Odds ratio (95% CI) |
| Model 1                                 | High                                | 1.00                                            | 1.00                                                                              |
|                                         | Medium                              | 1.59 (0.98-2.58)                                | 1.45 (0.89-2.37)                                                                  |
|                                         | Low                                 | 1.93 (1.19-3.12)                                | 1.63 (0.98-2.71)                                                                  |
| Model 1, adjusted for BMI               | High                                | 1.00                                            | 1.00                                                                              |
|                                         | Medium                              | NA <sup>b</sup>                                 | NA                                                                                |
|                                         | Low                                 | 1.52 (0.92-2.50)                                | NA                                                                                |
| Model 1, adjusted for physical activity | High                                | 1.00                                            | 1.00                                                                              |
|                                         | Medium                              | NA                                              | NA                                                                                |
|                                         | Low                                 | 1.90 (1.17-3.09)                                | NA                                                                                |
| Model 1, adjusted for smoking status    | High                                | 1.00                                            | 1.00                                                                              |
|                                         | Medium                              | NA                                              | NA                                                                                |
|                                         | Low                                 | 1.94 (1.20-3.14)                                | NA                                                                                |
| Model 1, adjusted for alcohol use       | High                                | 1.00                                            | 1.00                                                                              |
|                                         | Medium                              | NA                                              | NA                                                                                |
|                                         | Low                                 | 1.89 (1.16-3.07)                                | NA                                                                                |

<sup>a</sup> No diabetes, n=1864; newly diagnosed diabetes: n=130. <sup>b</sup> NA: not applicable.
